# Supplementary material for: ChREBPβ is dispensable for the control of glucose homeostasis and energy balance
Source: JCI journal article supplement (doi:10.1172/jci.insight.153431), 2022-01-18
Supplement: sd1 [file 1]

### A C57BL6/J Female

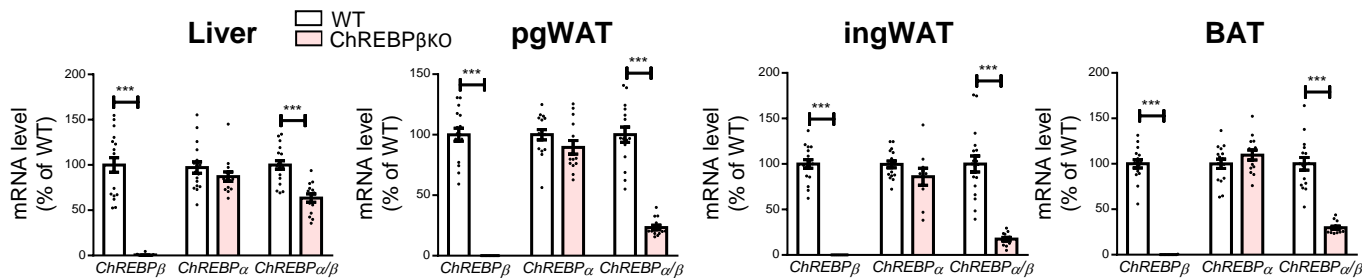

### B FVB/N Male

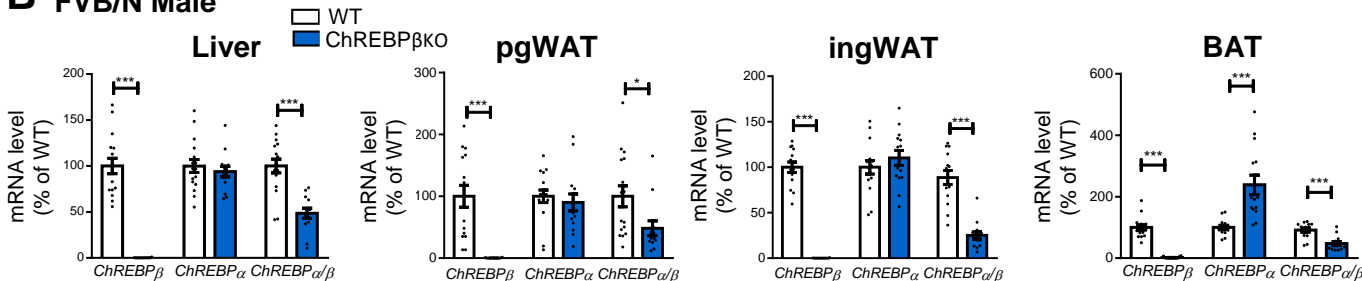

### C FVB/N Female

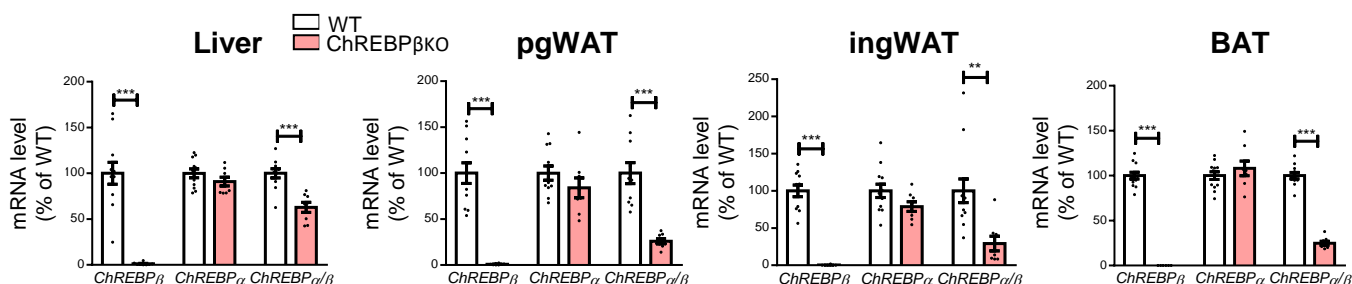

### D

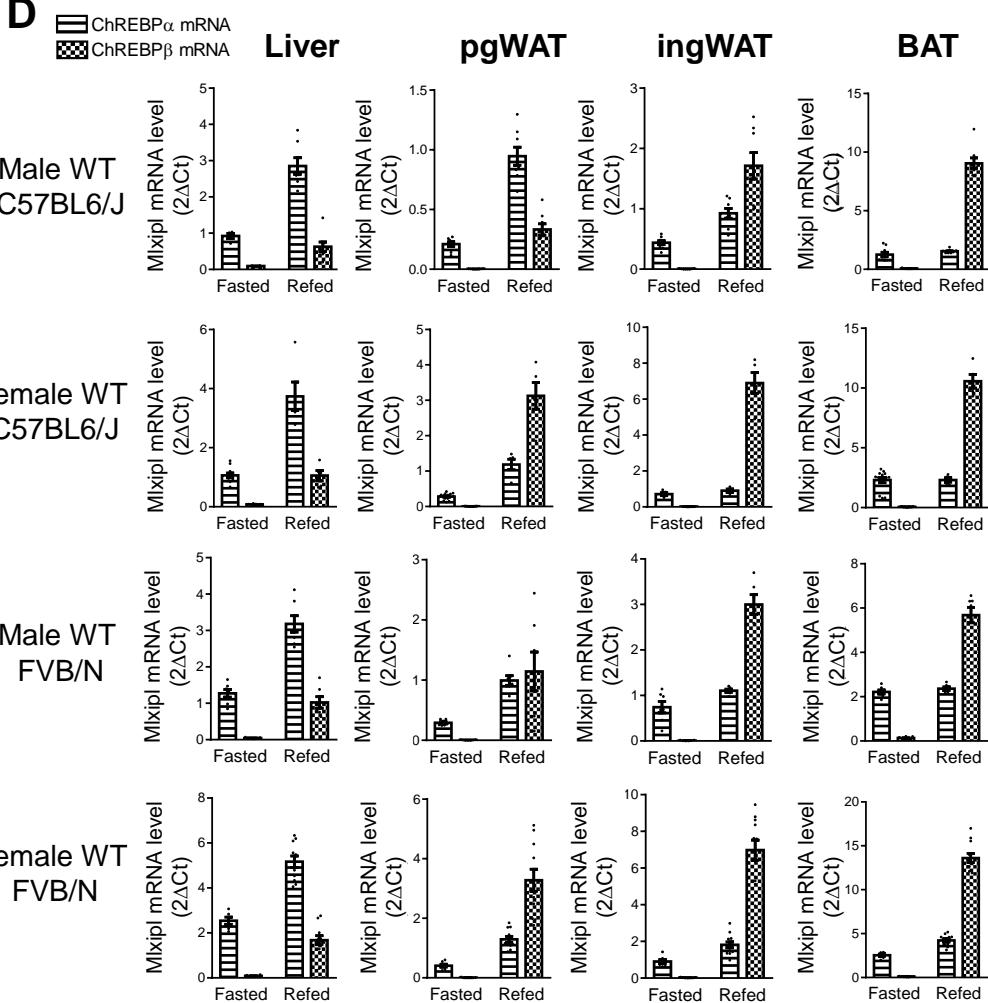

### E

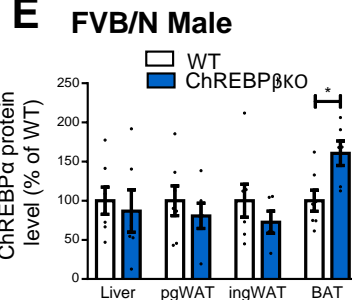

**Figure S1. Generation of ChREBP $\beta$ -deficient mice in C57BL6/J and FVB/N genetic backgrounds**

(A,B,C) mRNA levels of ChREBP isoforms in liver, perigonadal white adipose tissue (pgWAT), inguinal WAT (ingWAT) and interscapular brown adipose tissue (BAT) of refed female C57BL6/J (n=14-16) (A), male (n=13-16) (B) and female FVB/N (n=8-11) (C) mice. (D) mRNA levels of the ChREBP $\alpha$  and  $\beta$  isoforms of the *Mlxipl* gene in liver, pgWAT, ingWAT and BAT of wild type fasted and refed male and female C57BL6/J (n=6-15) and FVB/N (n=6-12) mice. Data are represented as  $2^{\Delta Ct}$  values. (E) Quantitation of ChREBP protein levels in liver, pgWAT and BAT of refed male FVB/N (n=5-7) mice. Data are mean  $\pm$  SEM. Statistical analysis was performed using Mann-Whitney tests. \*P<0.05, \*\*P<0.01, \*\*\*P<0.001.

## A C57BL6/J Male

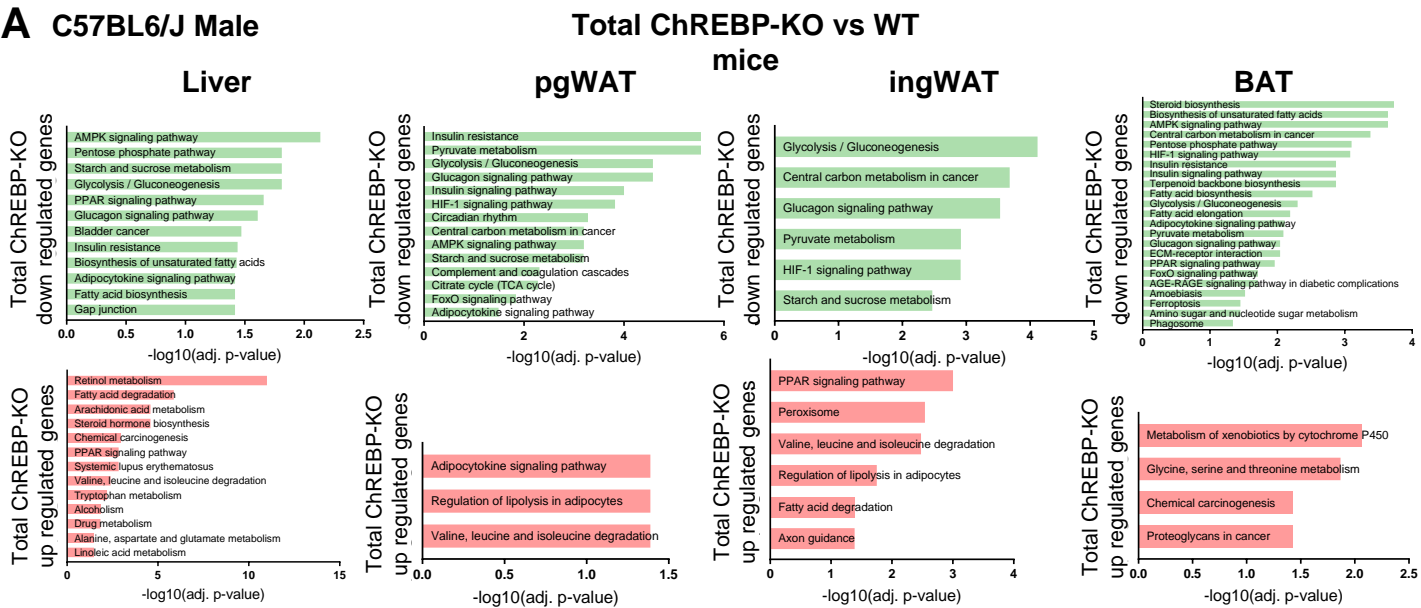

## B C57BL6/J Female

□ WT  
□ ChREBP $\beta$ KO

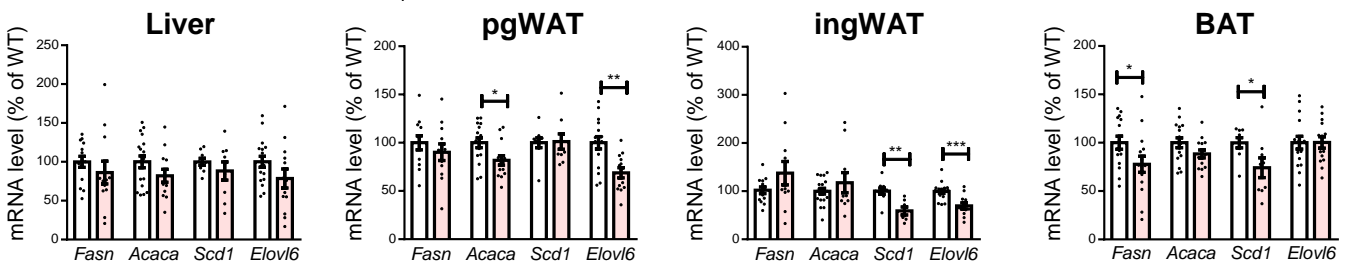

## C FVB/N Male

□ WT  
□ ChREBP $\beta$ KO

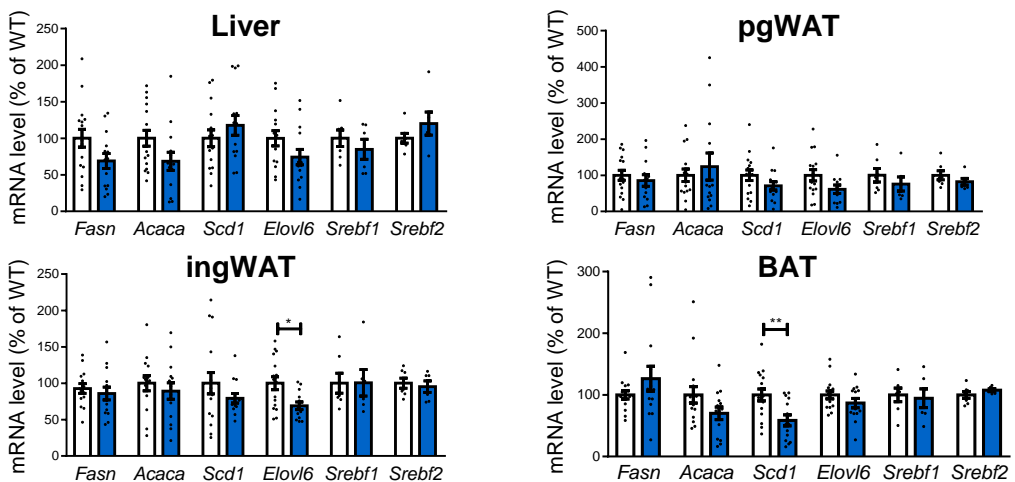

## D FVB/N Female

□ WT  
□ ChREBP $\beta$ KO

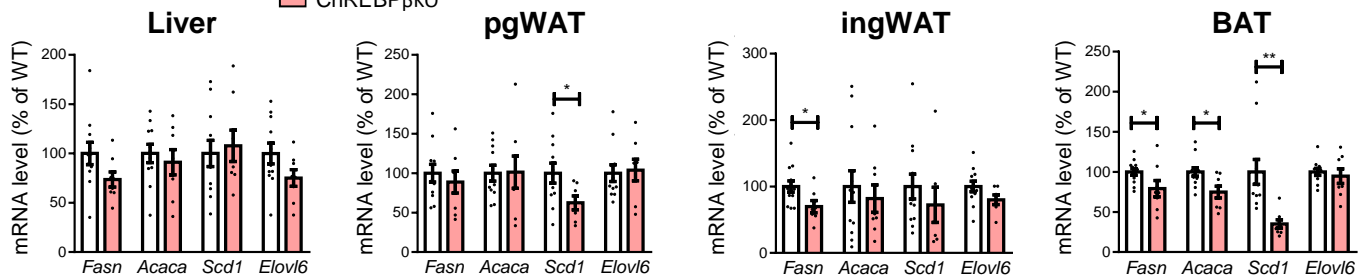

## Figure S2. Gene expression profiles in ChREBP-deficient mice

(A) Pathway analyses from DNA microarray data in liver, perigonadal white adipose tissue (pgWAT), inguinal WAT (ingWAT) and interscapular brown adipose tissue (BAT) of refed C57BL6/J male mice deficient in ChREBP $\alpha$  and  $\beta$  isoforms (Total ChREBP KO) (n=8 per group). (B,C,D) mRNA levels of de novo lipogenesis genes in liver, pgWAT, ingWAT and BAT of refed C57BL6/J female (n=9-18) (B), FVB/N male (n=6-16) (C) and female (n=8-12) (D) refed mice with ChREBP $\beta$  deficiency. Data are mean  $\pm$  SEM. Statistical analysis was performed using Mann-Whitney tests. \*P<0.05, \*\*P<0.01, \*\*\*P<0.001.

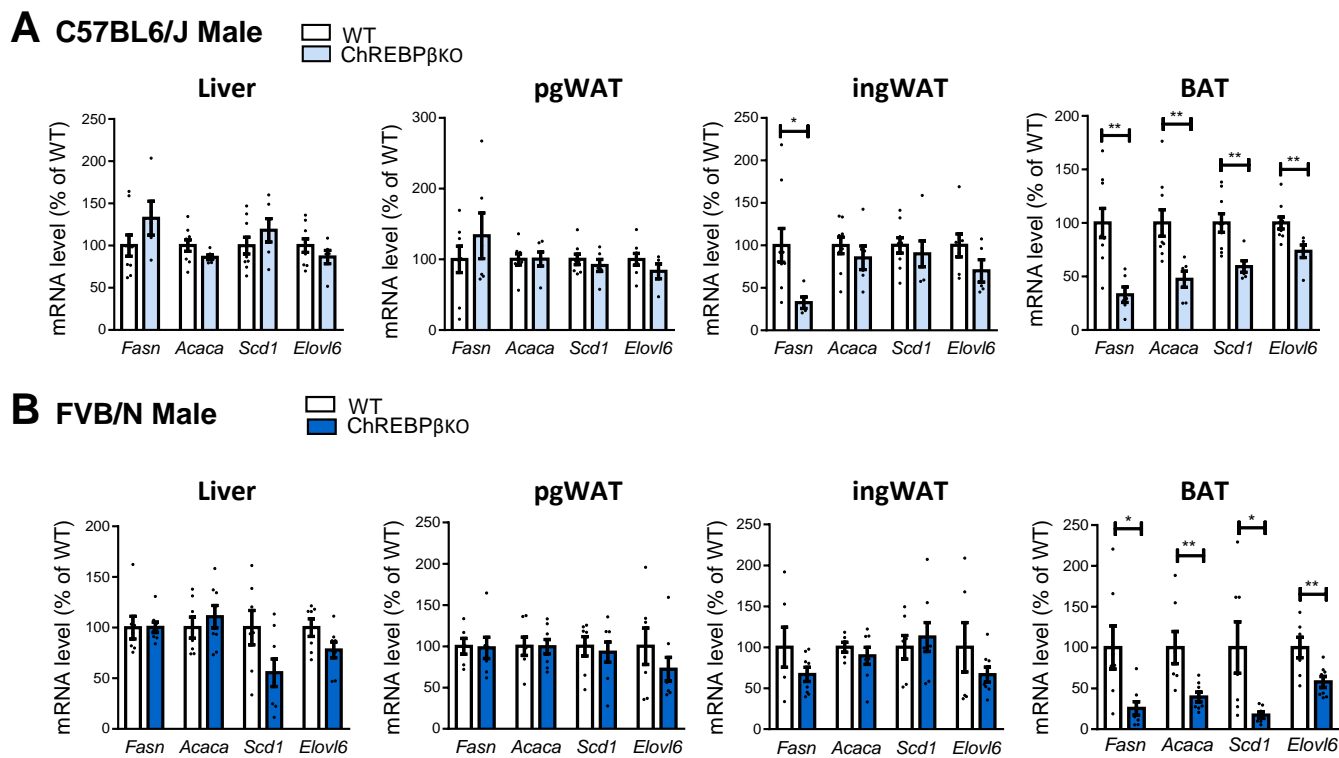

**Figure S3. Gene expression profiles in fasted ChREBP-deficient mice**

(A,B) mRNA levels of de novo lipogenesis genes in liver, pgWAT, ingWAT and BAT of C57BL6/J (n=5-9) (A) and FVB/N (n=7-8) (B) fasted male mice with ChREBP $\beta$  deficiency. Data are mean  $\pm$  SEM. Statistical analysis was performed using Mann-Whitney tests. \*P<0.05, \*\*P<0.01.

## A FVB/N Male

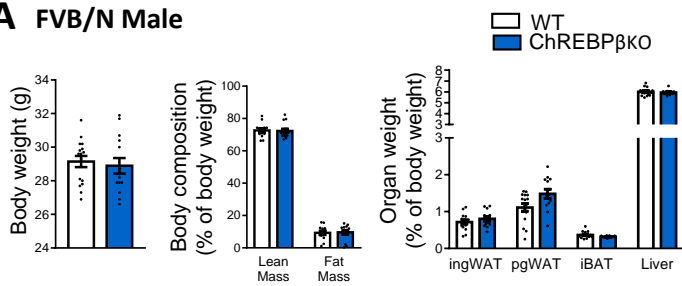

## B

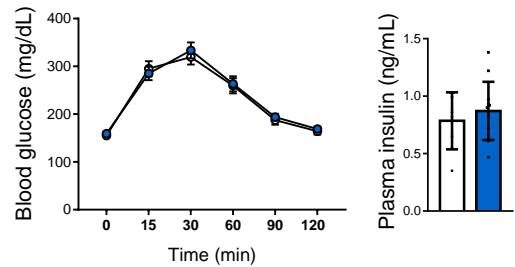

## C

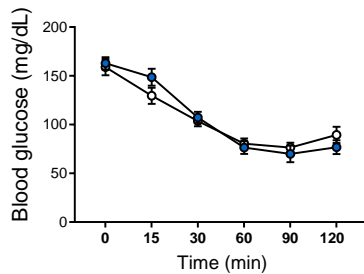

## D

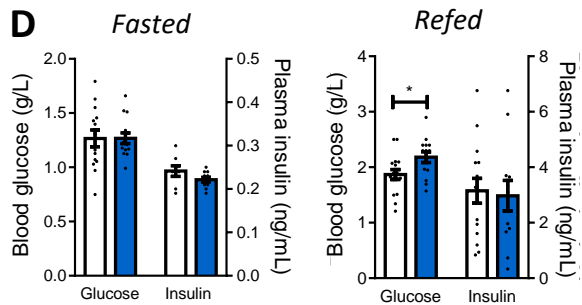

## E

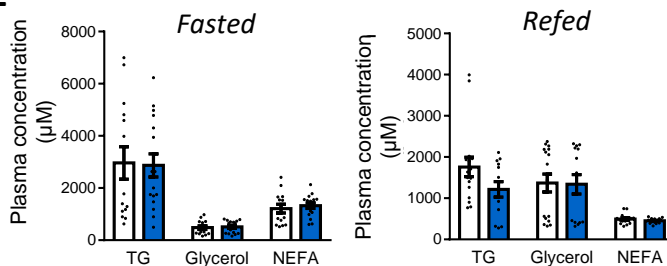

## F

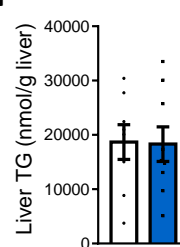

## Figure S4. Body composition and glucose homeostasis in male FVB/N ChREBP $\beta$ -deficient mice

(A) Body weight, lean and fat mass and, organ weight in refed male FVB/N mice (n=13-16). (B) Glucose tolerance tests and blood insulin levels 15 min post-injection during glucose tolerance tests (n=7-16). (C) Insulin tolerance test (n=7-11). (D) Blood glucose and insulin levels after 24h of fasting (left panels) and 18h of refeeding (right panels) (n=8-16). (E) Blood lipid levels after 24h of fasting (left panels) and 18h of refeeding (right panels). (F) Liver triglyceride (TG) levels after 18h of refeeding (n=8-9). NEFA, non esterified fatty acid. Data are mean  $\pm$  SEM. Statistical analysis was performed using Mann-Whitney test (A, B, D-F) or two-way ANOVA with Šídák post-hoc tests (B,C). \*P<0.05, \*\*P<0.01.

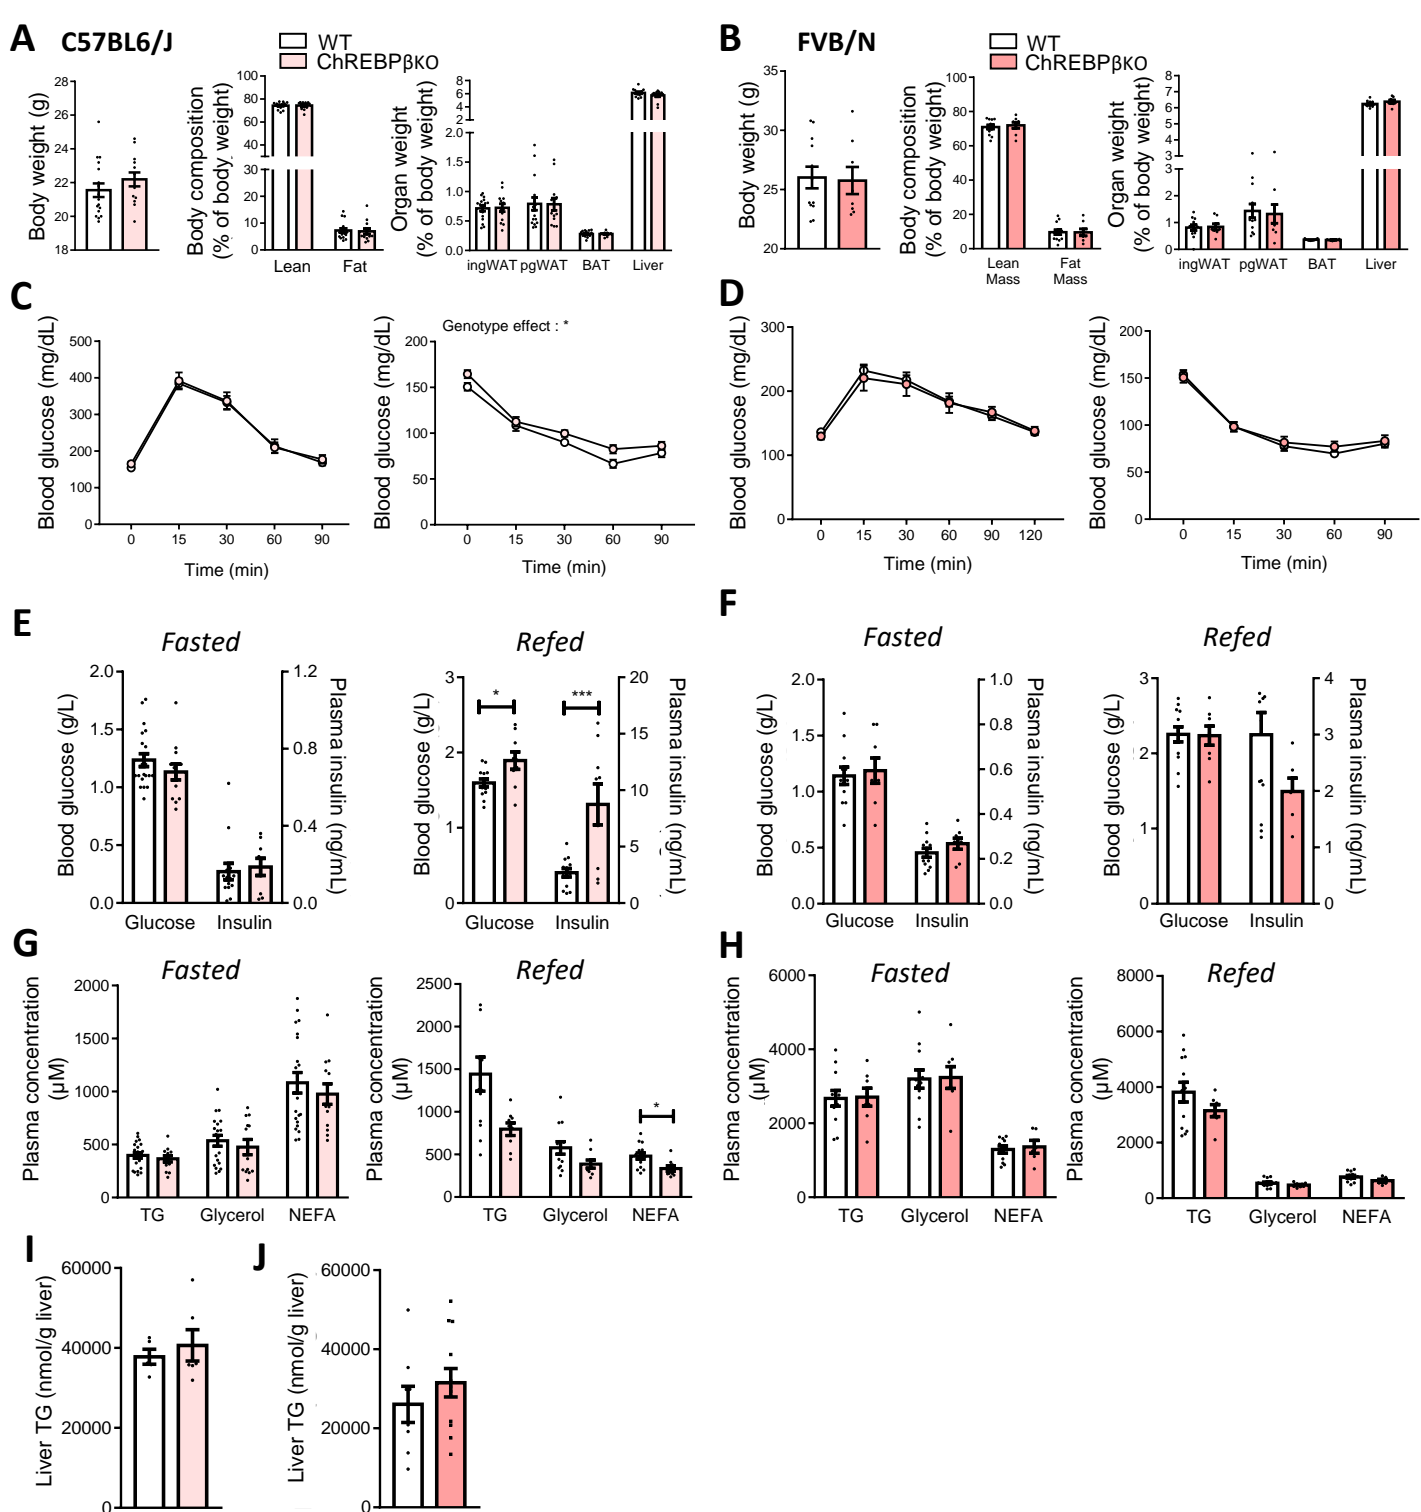

**Figure S5. Body composition and glucose homeostasis in female ChREBP $\beta$ -deficient mice**

(A,B) Body weight, lean and fat mass and, organ weight in refed female C57BL6/J (n=13-18) (A) and FVB/N (n=8-12) (B) mice. (C,D) Glucose (left panels) and insulin (right panels) tolerance tests in female C57BL6/J (n=7-18) (C) and FVB/N (n=10-15) (D) mice. (E-F) Blood glucose and insulin levels after 24h of fasting (left panels) and 18h of refeeding (right panels) in female C57BL6/J (n=9-16) (E) and FVB/N (n=6-13) (F) mice. (G-H) Blood lipid levels after 24h of fasting (left panels) and 18h of refeeding (right panels) in female C57BL6/J (n=9-17) (G) and FVB/N (n=7-13) (H) mice. (I-J) Liver triglyceride (TG) levels in female C57BL6/J (n=5-6) (I) and FVB/N (n=8-12) (J) mice after 18h of refeeding. NEFA, non esterified fatty acid. Data are mean  $\pm$  SEM. Statistical analysis was performed using Mann-Whitney test (A, B, E-J) or two-way ANOVA with Šidák post-hoc tests (C,D). \*P<0.05, \*\*P<0.01, \*\*\*P<0.001.

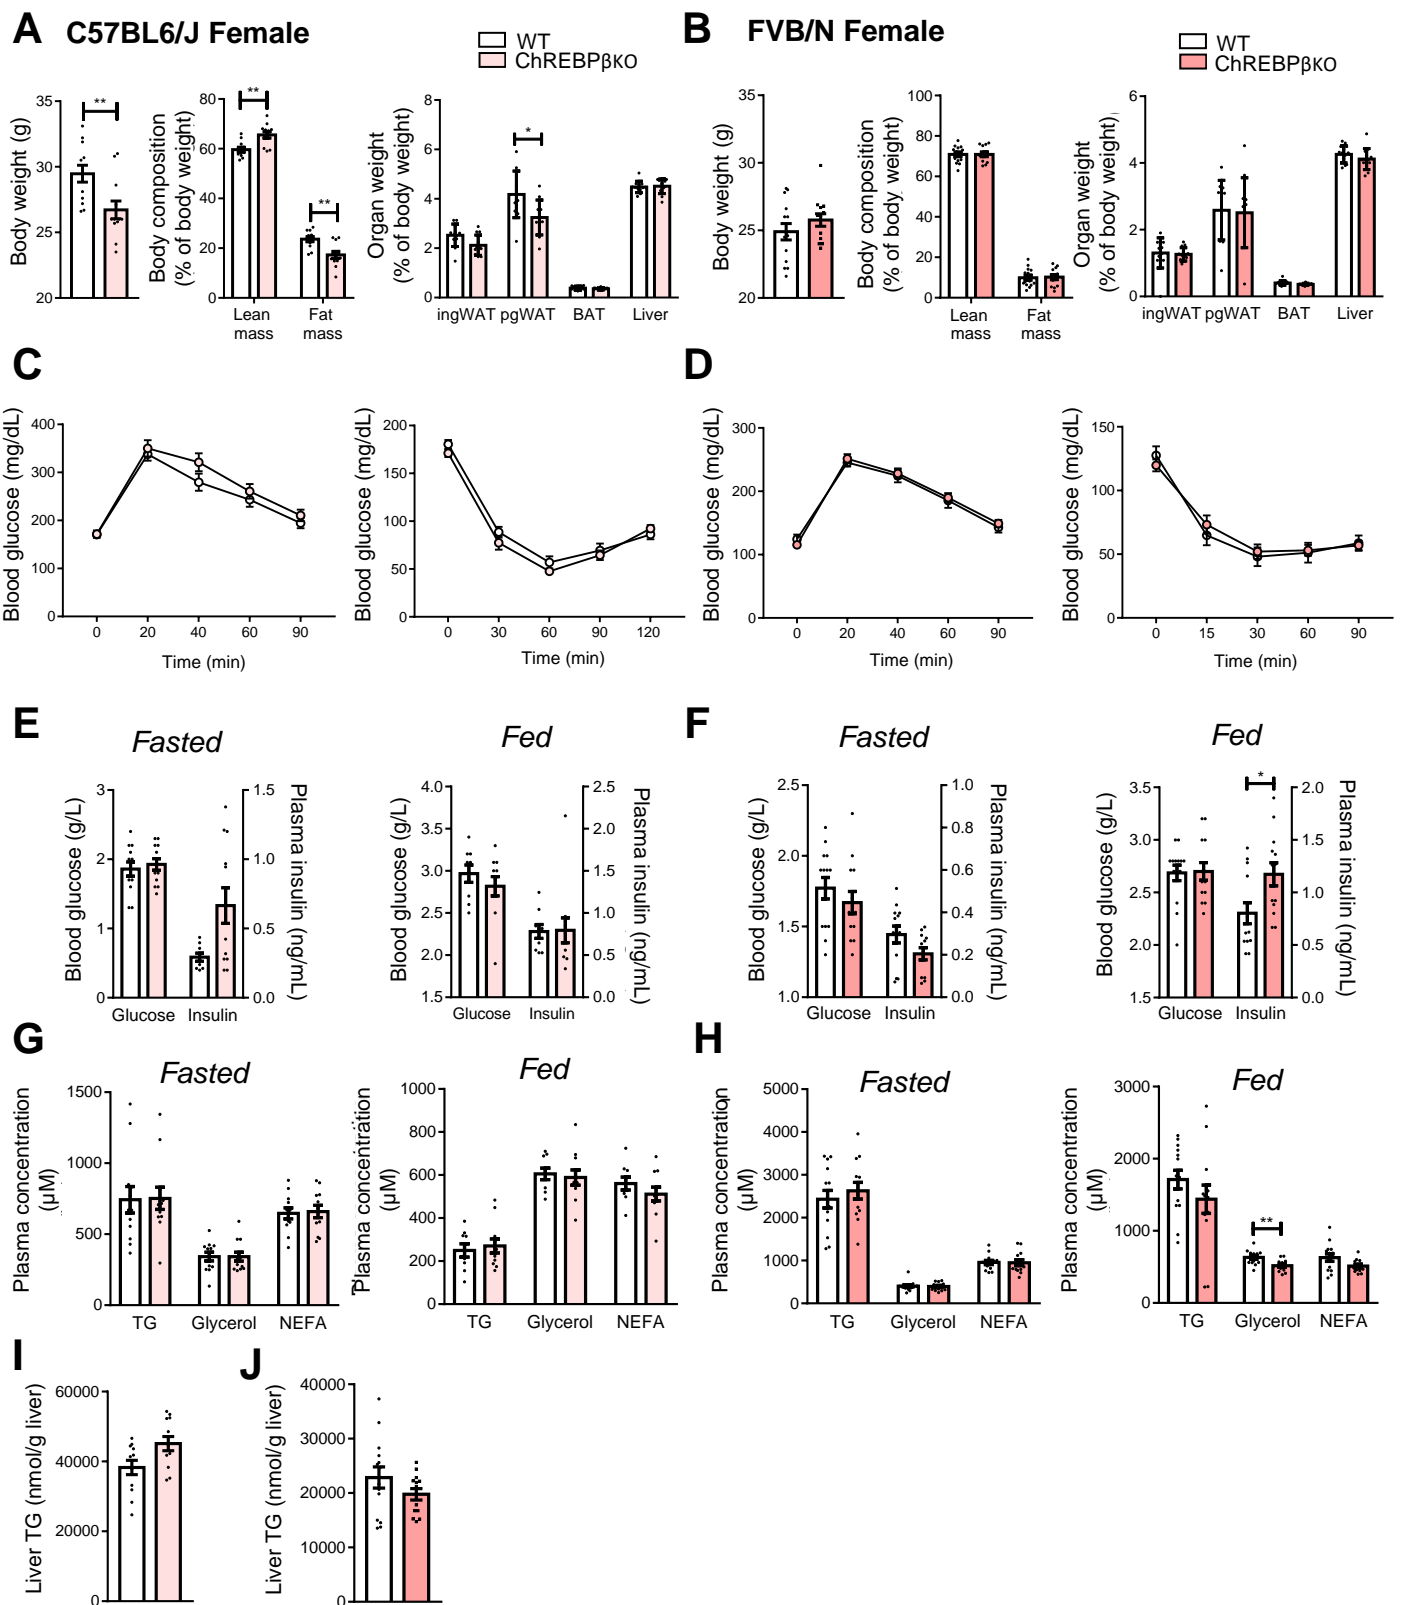

**Figure S6. Response of female ChREBP $\beta$ -deficient mice to high fat high sucrose diet**

(A-B) Body weight, lean and fat mass and, organ weight in C57BL6/J (n=12) (A) and FVB/N N (n=7-14) (B) mice fed high fat high sucrose diet. (C-D) Glucose (left panels) and insulin (right panels) tolerance tests in C57BL6/J (n=12) and FVB/N (8-14) mice. (E-F) Blood glucose and insulin levels after 24h of fasting (left panels) and 18h of refeeding (right panels) in C57BL6/J (n=9-12) (E) and FVB/N mice (n=14-13) (F). (G-H) Blood lipid levels after 24h of fasting (left panels) and 18h of refeeding (right panels) in C57BL6/J (n=9-12) (E) and FVB/N mice (n=14-13) (H). (I-J) Liver triglyceride (TG) levels in C57BL6/J (n=12) (I) and FVB/N (n=13-14) (J) mice. NEFA, non esterified fatty acid. Data are mean  $\pm$  SEM. Statistical analysis was performed using Mann-Whitney tests (A, B, E-J) or two-way ANOVA with Šidák post-hoc tests (C, D). \*P<0.05, \*\*P<0.01..

**Supplemental Table 1. ChREBP $\beta$  deficiency through CRISPR-Cas9-mediated gene editing technology**

(A) Mice born after electroporation of SpyCas9 complexed to two single guide RNAs

| Genetic strain | Nb of F0 | Nb of mutated F0 | Nb of mutated F0                |                         |
|----------------|----------|------------------|---------------------------------|-------------------------|
|                |          |                  | with a single deletion > 500 bp | % mice of interest / F0 |
| C57BL/6J       | 8        | 6                | 4                               | 50                      |
| FVB/N          | 51       | 20               | 16                              | 31                      |
| Both strains   | 59       | 26               | 20                              | 34                      |

(B) Numbers of litters and pups according to genotypes

| Strain   | Line              | Nb of litters | Nb of pups | Nb of pups per litter | WT              | Hemizygous      | KO (nb/%)       |
|----------|-------------------|---------------|------------|-----------------------|-----------------|-----------------|-----------------|
|          |                   |               |            |                       | (nb/%)          | (nb/%)          |                 |
| C57BL/6J | 32                | 42            | 313        | 7.5                   | 80 / 26         | 147 / 47        | 86 / 27         |
|          | 52                | 18            | 129        | 7.2                   | 33 / 26         | 44 / 34         | 52 / 40         |
|          | <i>Both lines</i> | <i>60</i>     | <i>442</i> | <i>7.4</i>            | <i>113 / 26</i> | <i>191 / 43</i> | <i>138 / 31</i> |
| FVB/N    | 15                | 38            | 363        | 9.6                   | 100 / 27        | 170 / 47        | 93 / 26         |
|          | 34                | 4             | 30         | 7.5                   | 11 / 38         | 13 / 43         | 6 / 20          |
|          | <i>Both lines</i> | <i>42</i>     | <i>393</i> | <i>9.4</i>            | <i>111 / 28</i> | <i>183 / 47</i> | <i>99 / 25</i>  |

Mice were from F2 generation and above were derived from matings of heterozygous parents.

WT, wild type mice; KO, ChREBP $\beta$ -knock-out mice.

**Supplemental Table 2. List of genes regulated in brown adipose tissue of ChREBP $\beta$ -deficient mice compared to brown adipose tissue of ChREBP $\alpha$  and  $\beta$ -deficient mice**

| Common ChREBP $\alpha$ and $\beta$<br>Up-regulated | ChREBP $\beta$ -specific<br>Up-regulated | Common ChREBP $\alpha$ and $\beta$<br>Down-regulated | ChREBP $\beta$ -specific<br>Down-regulated |
|----------------------------------------------------|------------------------------------------|------------------------------------------------------|--------------------------------------------|
| <i>Adra1d</i>                                      | <i>Adrb3</i>                             | <i>Pgm3</i>                                          | <i>AK086179</i>                            |
| <i>AK163904</i>                                    | <i>Clqtnf7</i>                           | <i>Maff</i>                                          | <i>A530010L16Rik</i>                       |
| <i>Armxc3</i>                                      | <i>Enc1</i>                              | <i>Recql4</i>                                        | <i>Tmprss9</i>                             |
| <i>Baalc</i>                                       | <i>Epdr1</i>                             | <i>Dcaf6</i>                                         | <i>AK047114</i>                            |
| <i>Car14</i>                                       | <i>Espn</i>                              | <i>Cbfa2t3</i>                                       | <i>Oprl1</i>                               |
| <i>Car3</i>                                        | <i>Fam124a</i>                           | <i>Acot1</i>                                         | <i>BC049352</i>                            |
| <i>Cbr3</i>                                        | <i>Fbxw4</i>                             | <i>Fras1</i>                                         | <i>Sik1</i>                                |
| <i>Ccdc3</i>                                       | <i>Fgf1</i>                              | <i>Tjp3</i>                                          |                                            |
| <i>Cd274</i>                                       | <i>Mutyh</i>                             | <i>Glul</i>                                          |                                            |
| <i>Chst11</i>                                      | <i>Prrt4</i>                             | <i>Prss35</i>                                        |                                            |
| <i>Efemp1</i>                                      | <i>Rspo4</i>                             | <i>Cldn22</i>                                        |                                            |
| <i>Esrrb</i>                                       | <i>Tnk2</i>                              | <i>Cnst</i>                                          |                                            |
| <i>Fam20c</i>                                      | <i>Trem3</i>                             | <i>Hemk1</i>                                         |                                            |
| <i>Fam222a</i>                                     | <i>Trib3</i>                             | <i>Pdzk1ip1</i>                                      |                                            |
| <i>Fzd4</i>                                        | <i>Trim80</i>                            | <i>Kit</i>                                           |                                            |
| <i>Gm14964</i>                                     | <i>Tuba1a</i>                            | <i>Dmrtc1a</i>                                       |                                            |
| <i>Gm6756</i>                                      | <i>Tuba8</i>                             | <i>Pth1r</i>                                         |                                            |
| <i>Gm8096</i>                                      | <i>Zfp36l2</i>                           | <i>Tspan18</i>                                       |                                            |
| <i>Grb14</i>                                       |                                          | <i>AK158867</i>                                      |                                            |
| <i>Gss</i>                                         |                                          | <i>C81189</i>                                        |                                            |
| <i>Hipk3</i>                                       |                                          | <i>Oxtr</i>                                          |                                            |

|                |                 |
|----------------|-----------------|
| <i>Krt79</i>   | <i>Nudt4</i>    |
| <i>Lgr6</i>    | <i>Fam57b</i>   |
| <i>Lhfpl2</i>  | <i>Atp1a3</i>   |
| <i>Lppr4</i>   | <i>Ttc25</i>    |
| <i>Lrtm1</i>   | <i>BB211547</i> |
| <i>Neat1</i>   | <i>Cpeb2</i>    |
| <i>Ninl</i>    | <i>Gm9112</i>   |
| <i>Nnmt</i>    | <i>Slc25a1</i>  |
| <i>Npr3</i>    | <i>Adcy10</i>   |
| <i>Nr0b1</i>   | <i>Sorl1</i>    |
| <i>Nrxn2</i>   | <i>Map6</i>     |
| <i>Phgdh</i>   | <i>Mlxipl</i>   |
| <i>Plekhg6</i> | <i>Rhob</i>     |
| <i>Pon1</i>    | <i>Atp8a1</i>   |
| <i>Prr32</i>   | <i>Tekt1</i>    |
| <i>Rnf182</i>  | <i>Gm5126</i>   |
| <i>Ryr2</i>    | <i>March3</i>   |
| <i>S100b</i>   | <i>Slc27a1</i>  |
| <i>Sesn2</i>   | <i>Ccdc57</i>   |
| <i>Slc40a1</i> | <i>Hyls1</i>    |
| <i>Smyd4</i>   | <i>Mc5r</i>     |
| <i>Sncg</i>    | <i>Prkab1</i>   |
| <i>Trim67</i>  | <i>Egln3</i>    |
| <i>Vipr2</i>   | <i>AK037550</i> |
|                | <i>Tkt</i>      |

*Slc38a10*

*Gata6*

*Fabp5*

*Acsl5*

*Hmmr*

*Rgs16*

*Flrt1*

*Mapk8ip1*

*Fhdc1*

*Foxred2*

*Tmie*

*Aspg*

*Smoc1*

*Vps37d*

*Dock3*

*E130101M22*

*Focad*

*Ccdc92*

*Sqle*

*Phyhip*

---

**Supplemental Table 3. List of primers used in reverse transcription-quantitative PCR**

| Gene name                              | Forward primer (5'→3')   | Reverse primer (5'→3')  |
|----------------------------------------|--------------------------|-------------------------|
| <i>Mlxipl</i> (ChREBP $\alpha/\beta$ ) | CACTCAGGGAATACACGCCTAC   | ATCTTGGTCTTAGGGTCTTCAGG |
| <i>Mlxipl</i> (ChREBP $\alpha$ )       | CGACACTCACCCACCTCTTC     | TTGTTTCAGCCGGATCTTGTC   |
| <i>Mlxipl</i> (ChREBP $\beta$ )        | TCTGCAGATCGCGTGGAG       | CTTGTCCC GG CATAGCAAC   |
| <i>Fasn</i>                            | GCTGCGGAAACTTCAGGAAAT    | AGAGACGTGTCACTCCTGGACTT |
| <i>Acaca</i>                           | GCCTCTTCTGACAAACGAG      | TGACTGCCGAAACATCTCTG    |
| <i>Scd1</i>                            | TACACCTGCCTCTTCGGGAT     | GCCGTGCCTTGTAAGTTCTG    |
| <i>Elovl6</i>                          | TGCAGGAAA ACTGGAAGAAGTCT | ATGCCGACCACCAAAGATAAA   |
| <i>Srebf1</i>                          | GCATGCCATGGGCAAGTAC      | TGTTGCCATGGAGATAGCATCT  |
| <i>Srebf2</i>                          | CTCCTTTCTGCCTCTGGTTCTC   | GCAAAATGCTCTCTGGTGCAA   |
| <i>Ucp1</i>                            | CCTGCCTCTCTCGGAAACAA     | TGTAGGCTGCCCAATGAACA    |
| <i>Prdm16</i>                          | CAGCACGGTGAAGCCATTC      | GCGTGCATCCGCTTGTG       |
| <i>Cidea</i>                           | ATCACAACTGGCCTGGTTACG    | TACTACCCGGTGTCCATTTCT   |
| <i>Cpt1b</i>                           | CCGGAAAGGTATGGCCACTT     | GAAGAAAATGCCTGTCGCCC    |
| <i>Cox5b</i>                           | GCTGCATCTGTGAAGAGGACAAC  | CAGCTTGTAATGGGTTCACAGT  |
| <i>Cox8b</i>                           | TGCGAAGTTCACAGTGGTTC     | TCAGGGATGTGCAACTTCA     |
| <i>Hprt</i>                            | TGGCCATCTGCCTAGTAAAGC    | GGACGCAGCAACTGACATTTTC  |
| <i>Cox1</i>                            | ACTATACTACTACTAACAGACCG  | GGTTCTTTTTTTCCGGAGTA    |
| <i>Ppia</i>                            | ACACGCCATAATGGCACTGG     | CAGTCTTGGCAGTGCAGAT     |
